# Supplementary material for: A Novel Fertility Indicator Equation Using Estradiol Levels for Assessment of Phase of the Menstrual Cycle
Source: PubMed Central journal article supplement (PMC7690440; doi:10.3390/medicina56110555), 2020-10-22
Supplement: medicina-56-00555-s001.pdf [file medicina-56-00555-s001.pdf]

SUPPLEMENTAL TABLES: COMPLETE DIGHE, ROOS, STRICKER COMPUTATIONS

Table 1a. Delta and Fertility Indicator Equation (FIE) values for day of cycle, **D**, from Dighe et al. data (Day -15 to Day 15).

| Day of Cycle | <sup>a</sup> Mean E2 Dighe (pg/ml) | Mean E2 Dighe (pmol/L) | <sup>b</sup> Delta( <b>D</b> ) Dighe Mean | <sup>c</sup> FIE( <b>D</b> ) Dighe Mean | E2 Upper 99%CI Dighe (pmol/L) | Delta( <b>D</b> ) Dighe Upper 99% | FIE( <b>D</b> ) Dighe Upper 99% | E2 Lower 99%CI Dighe (pmol/L) | Delta( <b>D</b> ) Dighe Lower 99% | FIE( <b>D</b> ) Dighe Lower 99% |
|--------------|------------------------------------|------------------------|-------------------------------------------|-----------------------------------------|-------------------------------|-----------------------------------|---------------------------------|-------------------------------|-----------------------------------|---------------------------------|
| -15          | 54.9                               | 202                    |                                           |                                         | 275                           |                                   |                                 | 128                           |                                   |                                 |
| -14          | 53.9                               | 198                    | -0.02                                     |                                         | 253                           | -0.08                             |                                 | 143                           | 0.117                             |                                 |
| -13          | 65                                 | 239                    | 0.207                                     | ind0.41                                 | 319                           | 0.261                             | ind2.087                        | 154                           | 0.077                             | 0.901                           |
| -12          | 57.9                               | 213                    | -0.109                                    | ind2.253                                | 261                           | -0.182                            | ind4.743                        | 165                           | 0.071                             | 0.549                           |
| -11          | 56.8                               | 209                    | -0.019                                    | -0.204                                  | 246                           | -0.057                            | -1.045                          | 176                           | 0.067                             | 0.476                           |
| -10          | 62                                 | 228                    | 0.091                                     | ind0.171                                | 275                           | 0.118                             | ind0.678                        | 180                           | 0.023                             | 0.152                           |
| -9           | 66.9                               | 246                    | 0.079                                     | 0.718                                   | 301                           | 0.095                             | 1.115                           | 191                           | 0.061                             | 0.139                           |
| -8           | 74.8                               | 275                    | 0.118                                     | 0.931                                   | 330                           | 0.096                             | 0.911                           | 224                           | 0.173                             | 1.056                           |
| -7           | 80.8                               | 297                    | 0.08                                      | 0.943                                   | 352                           | 0.067                             | 0.642                           | 242                           | 0.08                              | 1.388                           |
| -6           | 91.9                               | 338                    | 0.138                                     | 1.104                                   | 400                           | 0.136                             | 0.909                           | 279                           | 0.153                             | 1.229                           |
| -5           | 114.8                              | 422                    | 0.249                                     | 3.431                                   | 503                           | 0.258                             | 3.511                           | 341                           | 0.222                             | 3.398                           |
| -4           | 136.8                              | 503                    | 0.192                                     | 4.77                                    | 591                           | 0.175                             | 4.505                           | 411                           | 0.205                             | 4.562                           |
| -3           | 182.8                              | 672                    | 0.336                                     | 6.449                                   | 786                           | 0.33                              | 5.772                           | 554                           | 0.348                             | 7.142                           |
| -2           | 236.6                              | 870                    | 0.295                                     | 9.9                                     | 1013                          | 0.289                             | 9.529                           | 731                           | 0.319                             | 11.116                          |
| -1           | 303.6                              | 1116                   | 0.283                                     | 8.331                                   | 1325                          | 0.308                             | 8.895                           | 907                           | 0.241                             | 7.692                           |
| 0            | 251.6                              | 925                    | -0.171                                    | ind4.839                                | 1068                          | -0.194                            | ind5.974                        | 778                           | -0.142                            | ind3.424                        |
| 1            | 130.8                              | 481                    | -0.48                                     | -8.215                                  | 613                           | -0.426                            | -8.263                          | 352                           | -0.548                            | -7.788                          |
| 2            | 117.8                              | 433                    | -0.1                                      | -4.79                                   | 532                           | -0.132                            | -5.629                          | 334                           | -0.051                            | -2.8                            |
| 3            | 133.8                              | 492                    | 0.136                                     | ind1.36                                 | 595                           | 0.118                             | ind1.565                        | 385                           | 0.153                             | ind0.781                        |
| 4            | 157.8                              | 580                    | 0.179                                     | 2.437                                   | 697                           | 0.171                             | 2.03                            | 463                           | 0.203                             | 3.094                           |
| 5            | 157.8                              | 580                    | 0                                         | 0                                       | 701                           | 0.006                             | 0.098                           | 459                           | -0.009                            | ind0.175                        |

|    |       |     |        |          |     |        |          |     |        |          |
|----|-------|-----|--------|----------|-----|--------|----------|-----|--------|----------|
| 6  | 161.8 | 595 | 0.026  | 0        | 716 | 0.021  | 0.012    | 474 | 0.033  | ind0.028 |
| 7  | 164.8 | 606 | 0.018  | 0.048    | 720 | 0.006  | 0.012    | 496 | 0.046  | 0.152    |
| 8  | 148.8 | 547 | -0.097 | ind0.18  | 650 | -0.097 | ind0.054 | 444 | -0.105 | ind0.487 |
| 9  | 163.7 | 602 | 0.101  | ind0.979 | 727 | 0.118  | ind1.152 | 477 | 0.074  | ind0.779 |
| 10 | 157.8 | 580 | -0.037 | ind0.367 | 683 | -0.061 | ind0.717 | 474 | -0.006 | ind0.047 |
| 11 | 142.8 | 525 | -0.095 | -0.347   | 661 | -0.032 | -0.195   | 393 | -0.171 | -0.107   |
| 12 | 120.8 | 444 | -0.154 | -1.463   | 554 | -0.162 | -0.521   | 338 | -0.14  | -2.392   |
| 13 | 95.7  | 352 | -0.207 | -3.197   | 437 | -0.211 | -3.419   | 264 | -0.219 | -3.064   |
| 14 | 71.8  | 264 | -0.25  | -5.18    | 349 | -0.201 | -4.253   | 184 | -0.303 | -6.634   |
| 15 | 74.8  | 275 | 0.042  | ind1.042 | 422 | 0.209  | ind4.212 | 132 | -0.283 | -8.564   |

<sup>a</sup>Day-specific mean, upper 99% CI limit, and lower 99% CI limit reference range serum E2 levels from Dighe et al. [17].

<sup>b</sup>Delta(D) is calculated for day, D by: [E2 on day, D – E2 on day, D-1]/E2 on day, D-1.

<sup>c</sup>The magnitude of FIE on day, D, is FIE(D) and is calculated by: ((Delta(D) X (Delta(D-1) \* 100). The sign of FIE(D) is +, -, or indeterminate (written as ind) and is assigned as follows: +Delta(D) X +Delta(D-1) is +; -Delta(D) X -Delta(D-1) is -; and -Delta(D) X +Delta(D-1) or +Delta(D) X -Delta(D-1) is ind.

Table 1b. Delta and Fertility Indicator Equation (FIE) values for day of cycle, D, from Roos et al. data (Day -15 to Day 12).

| Day of Cycle | <sup>a</sup> Median E2 Roos (pg/ml) | Median E2 Roos (pmol/L) | <sup>b</sup> Delta(D) Roos Median | <sup>c</sup> FIE(D) Roos Median | E2 90th PCTL Roos (pmol/L) | Delta(D) Roos 90th PCTL | FIE(D) Roos 90th PCTL | E2 10th PCTL Roos (pmol/L) | Delta(D) Roos 10th PCTL | FIE(D) Roos 10th PCTL |
|--------------|-------------------------------------|-------------------------|-----------------------------------|---------------------------------|----------------------------|-------------------------|-----------------------|----------------------------|-------------------------|-----------------------|
| -15          | 44.0                                | 161.9                   |                                   |                                 | 177.5                      |                         |                       | 106.7                      |                         |                       |
| -14          | 22.8                                | 83.7                    | -0.483                            |                                 | 83.7                       | -0.528                  |                       | 83.7                       | -0.216                  |                       |
| -13          | 44.8                                | 164.8                   | 0.969                             | ind46.801                       | 166.3                      | 0.987                   | ind52.151             | 156.3                      | 0.867                   | ind18.697             |
| -12          | 42.0                                | 154.5                   | -0.063                            | ind6.056                        | 165.2                      | -0.007                  | ind0.653              | 128                        | -0.181                  | ind15.705             |
| -11          | 41.6                                | 153.1                   | -0.009                            | -0.057                          | 168.1                      | 0.018                   | ind0.012              | 143.4                      | 0.120                   | ind2.178              |
| -10          | 44.1                                | 162.1                   | 0.059                             | ind0.053                        | 218.1                      | 0.297                   | 0.522                 | 81.9                       | -0.429                  | ind5.160              |
| -9           | 58.7                                | 215.9                   | 0.332                             | 1.951                           | 258.8                      | 0.187                   | 5.551                 | 135.1                      | 0.650                   | ind27.858             |
| -8           | 47.6                                | 175.1                   | -0.189                            | ind6.272                        | 269.5                      | 0.041                   | 0.772                 | 136.2                      | 0.008                   | 0.529                 |
| -7           | 64.9                                | 238.6                   | 0.363                             | ind6.853                        | 351.9                      | 0.306                   | 1.264                 | 138.5                      | 0.017                   | 0.014                 |
| -6           | 70.6                                | 259.6                   | 0.088                             | 3.192                           | 334.6                      | -0.049                  | ind1.503              | 157.6                      | 0.138                   | 0.233                 |

|    |       |       |        |           |        |        |           |       |        |           |
|----|-------|-------|--------|-----------|--------|--------|-----------|-------|--------|-----------|
| -5 | 84.3  | 309.8 | 0.193  | 1.702     | 608.1  | 0.817  | ind4.018  | 199.3 | 0.265  | 3.649     |
| -4 | 140.4 | 516.3 | 0.667  | 12.890    | 626.9  | 0.031  | 2.527     | 262.8 | 0.319  | 8.430     |
| -3 | 121.6 | 446.9 | -0.134 | ind8.960  | 809.1  | 0.291  | 0.899     | 337.3 | 0.283  | 9.032     |
| -2 | 212.1 | 779.7 | 0.745  | ind10.010 | 1144.5 | 0.415  | 12.048    | 458.4 | 0.359  | 10.178    |
| -1 | 259.7 | 954.6 | 0.224  | 16.705    | 1359.4 | 0.188  | 7.784     | 580.9 | 0.267  | 9.594     |
| 0  | 232.0 | 853.1 | -0.106 | ind2.385  | 1220.8 | -0.102 | ind1.914  | 489.3 | -0.158 | ind4.214  |
| 1  | 82.0  | 301.6 | -0.646 | -6.874    | 494.1  | -0.595 | -6.069    | 177.9 | -0.636 | -10.035   |
| 2  | 85.6  | 314.6 | 0.043  | ind2.786  | 448.2  | -0.093 | -5.530    | 248.3 | 0.396  | ind25.185 |
| 3  | 130.2 | 478.7 | 0.522  | 2.248     | 595.1  | 0.328  | ind3.045  | 268   | 0.079  | 3.140     |
| 4  | 72.4  | 266.1 | -0.444 | ind23.166 | 266.1  | -0.553 | ind18.120 | 266.1 | -0.007 | ind0.056  |
| 5  | 196.0 | 720.6 | 1.708  | ind75.856 | 720.6  | 1.708  | ind94.427 | 720.6 | 1.708  | ind1.211  |
| 6  | 186.9 | 687.2 | -0.046 | ind7.917  | 687.2  | -0.046 | ind7.917  | 687.2 | -0.046 | ind7.917  |
| 7  | 107.3 | 394.6 | -0.426 | -1.974    | 675.8  | -0.017 | -0.077    | 274.4 | -0.601 | -2.784    |
| 8  | 111.3 | 409.3 | 0.037  | ind1.586  | 681.5  | 0.008  | ind0.014  | 266.1 | -0.030 | -1.817    |
| 9  | 141.7 | 521.1 | 0.273  | 1.018     | 698.9  | 0.026  | 0.022     | 355.1 | 0.334  | ind1.012  |
| 10 | 125.6 | 461.8 | -0.114 | ind3.108  | 672.9  | -0.037 | ind0.095  | 286   | -0.195 | ind6.508  |
| 11 | 101.5 | 373.3 | -0.192 | -2.181    | 468.1  | -0.304 | -1.132    | 215.3 | -0.247 | -4.810    |
| 12 | 82.2  | 302.1 | -0.191 | -3.655    | 403.7  | -0.138 | -4.187    | 200.5 | -0.069 | -1.699    |

<sup>a</sup>Day-specific median, 90<sup>th</sup> percentile (PCTL), and 10<sup>th</sup> PCTL reference range serum E2 levels from Roos et al. [18].

<sup>b</sup>Delta(**D**) is calculated as in table 1a.

<sup>c</sup>The magnitude and sign of FIE(**D**) and is in table 1a.

Table 1c. Delta and Fertility Indicator Equation (FIE) values for day of cycle, **D**, from Stricker et al. data (Day -15 to Day 14).

| Day of Cycle | Mean E2 Stricker (pg/ml) | Mean E2 Stricker (pmol/L) | Delta( <b>D</b> ) Stricker Mean | FIE( <b>D</b> ) Stricker Mean | E2 95th PCTL Stricker (pmol/L) | Delta( <b>D</b> ) Stricker 95th PCTL | FIE( <b>D</b> ) Stricker 95th PCTL | E2 5th PCTL Stricker (pmol/L) | Delta( <b>D</b> ) Stricker 5th PCTL | FIE( <b>D</b> ) Stricker 5th PCTL |
|--------------|--------------------------|---------------------------|---------------------------------|-------------------------------|--------------------------------|--------------------------------------|------------------------------------|-------------------------------|-------------------------------------|-----------------------------------|
| -15          | 32.21                    | 118.42                    |                                 |                               | 194.44                         |                                      |                                    | 57.55                         |                                     |                                   |
| -14          | 36.18                    | 133.01                    | 0.123                           |                               | 187.67                         | -0.035                               |                                    | 66.06                         | 0.148                               |                                   |

|     |        |        |        |          |         |        |          |        |        |          |
|-----|--------|--------|--------|----------|---------|--------|----------|--------|--------|----------|
| -13 | 36.22  | 133.17 | 0.001  | 0.015    | 189.34  | 0.009  | ind0.031 | 75.2   | 0.138  | 2.046    |
| -12 | 34.26  | 125.95 | -0.054 | ind0.007 | 200.97  | 0.061  | 0.055    | 79.42  | 0.056  | 0.776    |
| -11 | 36.62  | 134.65 | 0.069  | ind0.375 | 196.75  | -0.021 | ind0.129 | 82.98  | 0.045  | 0.252    |
| -10 | 41.16  | 151.33 | 0.124  | 0.856    | 209.56  | 0.065  | ind0.137 | 87.6   | 0.056  | 0.250    |
| -9  | 43.38  | 159.48 | 0.054  | 0.667    | 224.68  | 0.072  | 0.470    | 93.4   | 0.066  | 0.369    |
| -8  | 46.33  | 170.34 | 0.068  | 0.367    | 220.86  | -0.017 | ind0.123 | 112.49 | 0.204  | 1.353    |
| -7  | 53.28  | 195.9  | 0.150  | 1.022    | 267.33  | 0.210  | ind0.358 | 124.67 | 0.108  | 2.213    |
| -6  | 62.07  | 228.2  | 0.165  | 2.474    | 313.36  | 0.172  | 3.623    | 157.66 | 0.265  | 2.865    |
| -5  | 73.19  | 269.07 | 0.179  | 2.953    | 346.76  | 0.107  | 1.835    | 190.47 | 0.208  | 5.507    |
| -4  | 93.48  | 343.68 | 0.277  | 4.966    | 490.81  | 0.415  | 4.428    | 186.47 | -0.021 | ind0.436 |
| -3  | 129.82 | 477.27 | 0.389  | 10.778   | 803.56  | 0.637  | 26.471   | 241.52 | 0.295  | ind0.619 |
| -2  | 179.84 | 661.19 | 0.385  | 14.979   | 1153.76 | 0.436  | 27.770   | 337.35 | 0.397  | 11.168   |
| -1  | 248.84 | 914.84 | 0.384  | 14.783   | 1517.67 | 0.315  | 13.746   | 503.85 | 0.494  | 19.583   |
| 0   | 212.37 | 780.76 | -0.147 | ind5.622 | 1425.39 | -0.061 | ind1.918 | 482    | -0.043 | ind2.140 |
| 1   | 87.20  | 320.59 | -0.589 | -8.638   | 514.35  | -0.639 | -3.886   | 159.87 | -0.668 | -2.898   |
| 2   | 71.08  | 261.32 | -0.185 | -10.896  | 398.38  | -0.225 | -14.411  | 154.62 | -0.033 | -2.195   |
| 3   | 92.19  | 338.94 | 0.297  | ind5.491 | 495.82  | 0.245  | ind5.515 | 208.64 | 0.349  | ind1.147 |
| 4   | 123.51 | 454.07 | 0.340  | 10.089   | 665.99  | 0.343  | 8.395    | 269.8  | 0.293  | 10.241   |
| 5   | 135.86 | 499.49 | 0.100  | 3.398    | 703.85  | 0.057  | 1.951    | 292.57 | 0.084  | 2.474    |
| 6   | 135.20 | 497.07 | -0.005 | ind0.048 | 719.72  | 0.023  | 0.128    | 267.07 | -0.087 | ind0.736 |
| 7   | 144.47 | 531.14 | 0.069  | ind0.033 | 695.47  | -0.034 | ind0.076 | 291.71 | 0.092  | ind0.804 |
| 8   | 137.19 | 504.39 | -0.050 | ind0.345 | 718.2   | 0.033  | ind0.110 | 281.91 | -0.034 | ind0.310 |
| 9   | 135.78 | 499.18 | -0.010 | -0.052   | 764.41  | 0.064  | 0.210    | 279.18 | -0.010 | -0.033   |
| 10  | 143.26 | 526.68 | 0.055  | ind0.057 | 806.7   | 0.055  | 0.356    | 294.48 | 0.055  | ind0.053 |
| 11  | 95.38  | 350.65 | -0.334 | ind1.841 | 640.16  | -0.206 | ind1.142 | 210.22 | -0.286 | ind1.568 |
| 12  | 87.65  | 322.24 | -0.081 | -2.708   | 546.15  | -0.147 | -3.032   | 174.82 | -0.168 | -4.818   |
| 13  | 62.48  | 229.7  | -0.287 | -2.327   | 497.74  | -0.089 | -1.302   | 101.93 | -0.417 | -7.021   |
| 14  | 67.80  | 249.28 | 0.085  | ind2.448 | 693.54  | 0.393  | ind3.487 | 93.97  | -0.078 | -3.256   |

<sup>a</sup>Day-specific mean, 95<sup>th</sup> percentile (PCTL), and 5<sup>th</sup> PCTL reference range serum E2 levels from Stricker et al. [19].

<sup>b</sup>Delta(D) is calculated as in table 1a.

<sup>c</sup>The magnitude and sign of FIE(D) and is in table 1a.
